# Supplementary material for: Direct vs. Expressed Breast Milk Feeding: Relation to Duration of Breastfeeding
Source: PubMed Central journal article supplement (PMC5490526; doi:10.3390/nu9060547), 2017-05-27
Supplement: nutrients-09-00547-s001.pdf [file nutrients-09-00547-s001.pdf]

Supplementary table S1. Associations of the mode of breastfeeding at 3 months post-delivery on the risk of terminating any and full breastfeeding, with further adjustment for the reasons for breast milk expression.

|                                                       | <i>n</i> | Terminating any breastfeeding        | Terminating full breastfeeding       |
|-------------------------------------------------------|----------|--------------------------------------|--------------------------------------|
|                                                       |          | Adjusted <sup>1</sup><br>HR (95% CI) | Adjusted <sup>1</sup><br>HR (95% CI) |
| All mothers breastfeeding at 3 months post-delivery   |          |                                      |                                      |
| Direct breastfeeding                                  | 217      | Reference                            |                                      |
| Mixed feeding                                         | 198      | 1.22 (0.74, 2.03)                    |                                      |
| Expressed breast milk only                            | 82       | 1.85 (1.05, 3.28)                    |                                      |
| Mothers fully breastfeeding at 3 months post-delivery |          |                                      |                                      |
| Direct breastfeeding                                  | 72       | Reference                            | Reference                            |
| Mixed feeding                                         | 76       | 1.00 (0.43, 2.28)                    | 1.18 (0.65, 2.16)                    |
| Expressed breast milk only                            | 11       | 1.66 (0.52, 5.34)                    | 1.28 (0.52, 3.18)                    |

<sup>1</sup>Full model included adjustments for maternal age (continuous), ethnicity (Chinese, Malay, Indian), maternal education (secondary education or below, technical college/pre-university, university), parity (primipara, multipara), pre-pregnancy BMI (continuous), birth weight category (SGA, AGA, LGA), child's sex (male, female), working during 1<sup>st</sup> trimester pregnancy (no, yes) and reasons for breast milk expression (has excess breast milk/ to store for future use or for work, all other reasons).
